# Supplementary material for: Cell non-autonomous signaling through the conserved C. elegans glycoprotein hormone receptor FSHR-1 regulates cholinergic neurotransmission
Source: PubMed Central journal article supplement (PMC11614273; doi:10.1371/journal.pgen.1011461), 2024-11-19

## Levamisole Paralysis

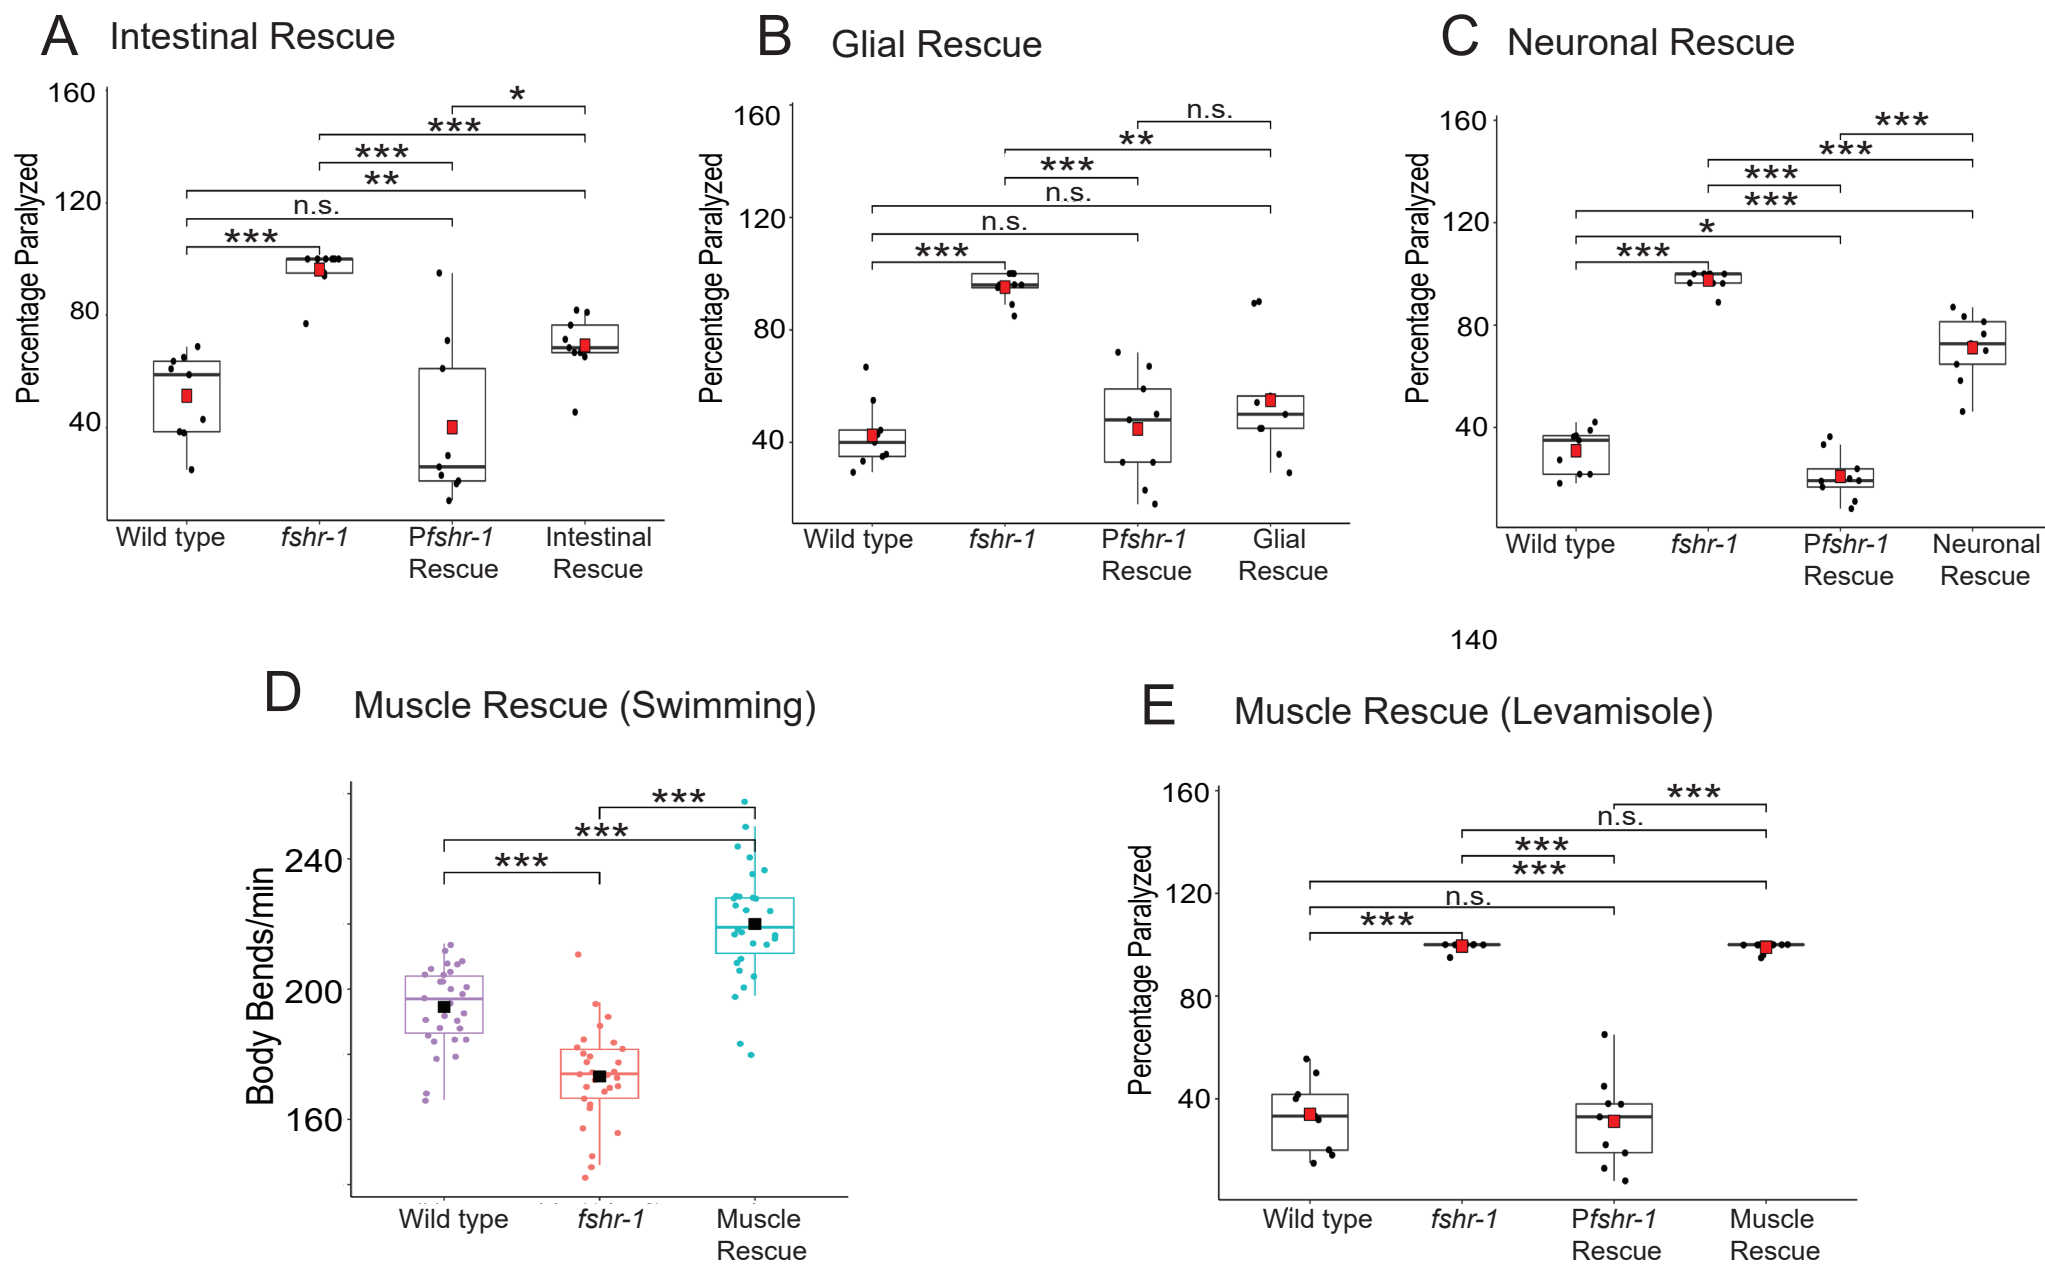

Supplement: pgen.1011461.s005.pdf [file pgen.1011461.s005.pdf]
