# Supplementary material for: Cell non-autonomous signaling through the conserved C. elegans glycoprotein hormone receptor FSHR-1 regulates cholinergic neurotransmission
Source: PubMed Central journal article supplement (PMC11614273; doi:10.1371/journal.pgen.1011461), 2024-11-19

## Glial Rescue

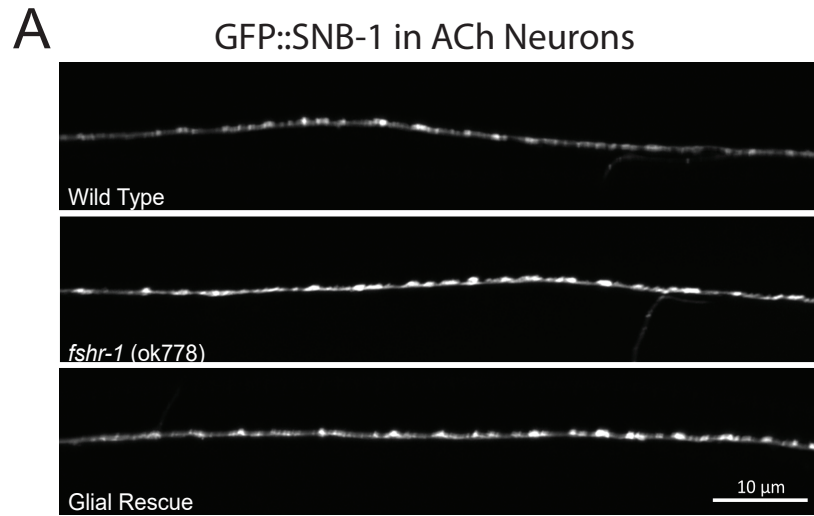

Puncta Intensity (normalized)

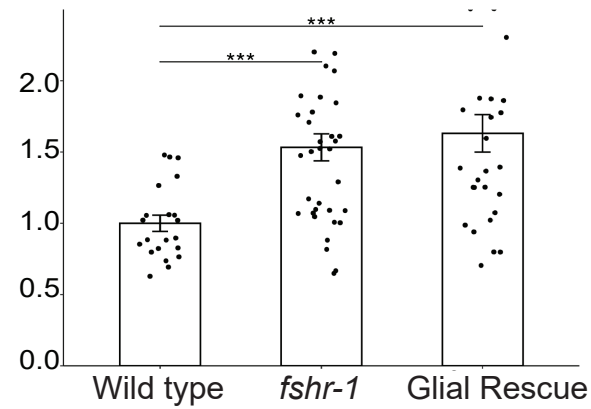Puncta Density (per 10  $\mu$ m)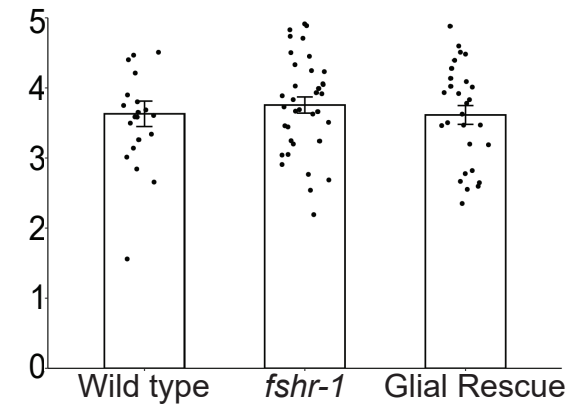

## Neuronal Rescue

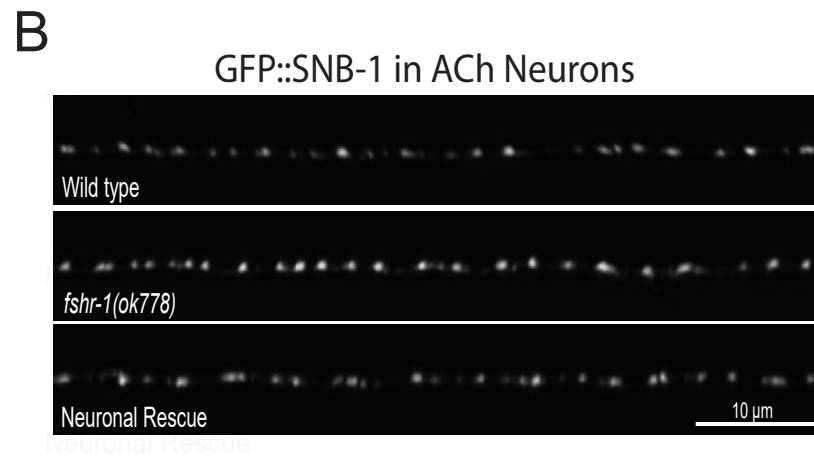

Puncta Intensity (normalized)

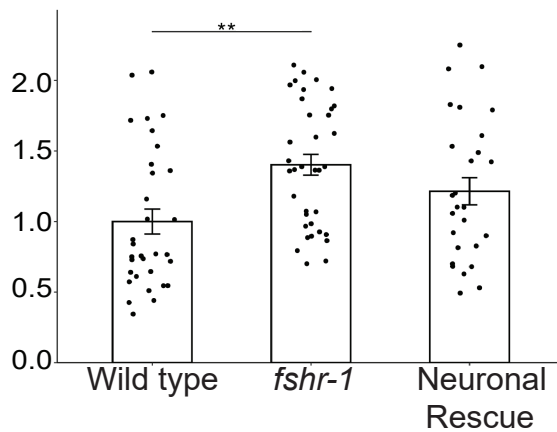Puncta Density (per 10  $\mu$ m)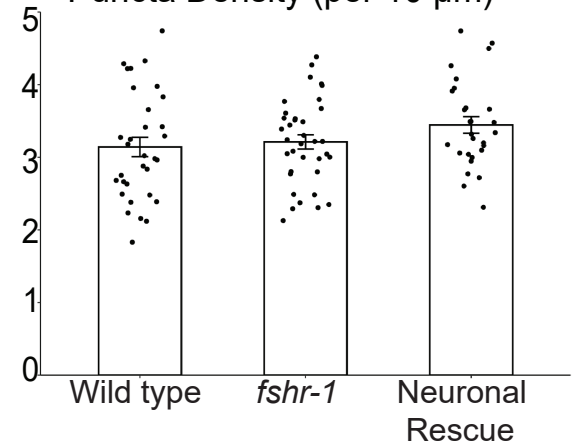

Supplement: pgen.1011461.s006.pdf [file pgen.1011461.s006.pdf]
